# Supplementary material
Source: publisher site journal article supplement (https://www.dovepress.com/get_supplementary_file.php?f=271711.docx)

**Supplementary Figure 1 MiR-182 agomir control had no effect on apoptosis and migration of TE-9 cells.** **(A)** TE-9 cells were treated with LOC441178-OE plasmids or/and miR-182 agomir control. Apoptotic cells were measured by flow cytometry. **(B)** TE-9 cells were infected with LOC441178-OE plasmids for 24 h in the absence or presence of miR-182 agomir control. Cell migration was assessed using transwell assay. **P<0.01.


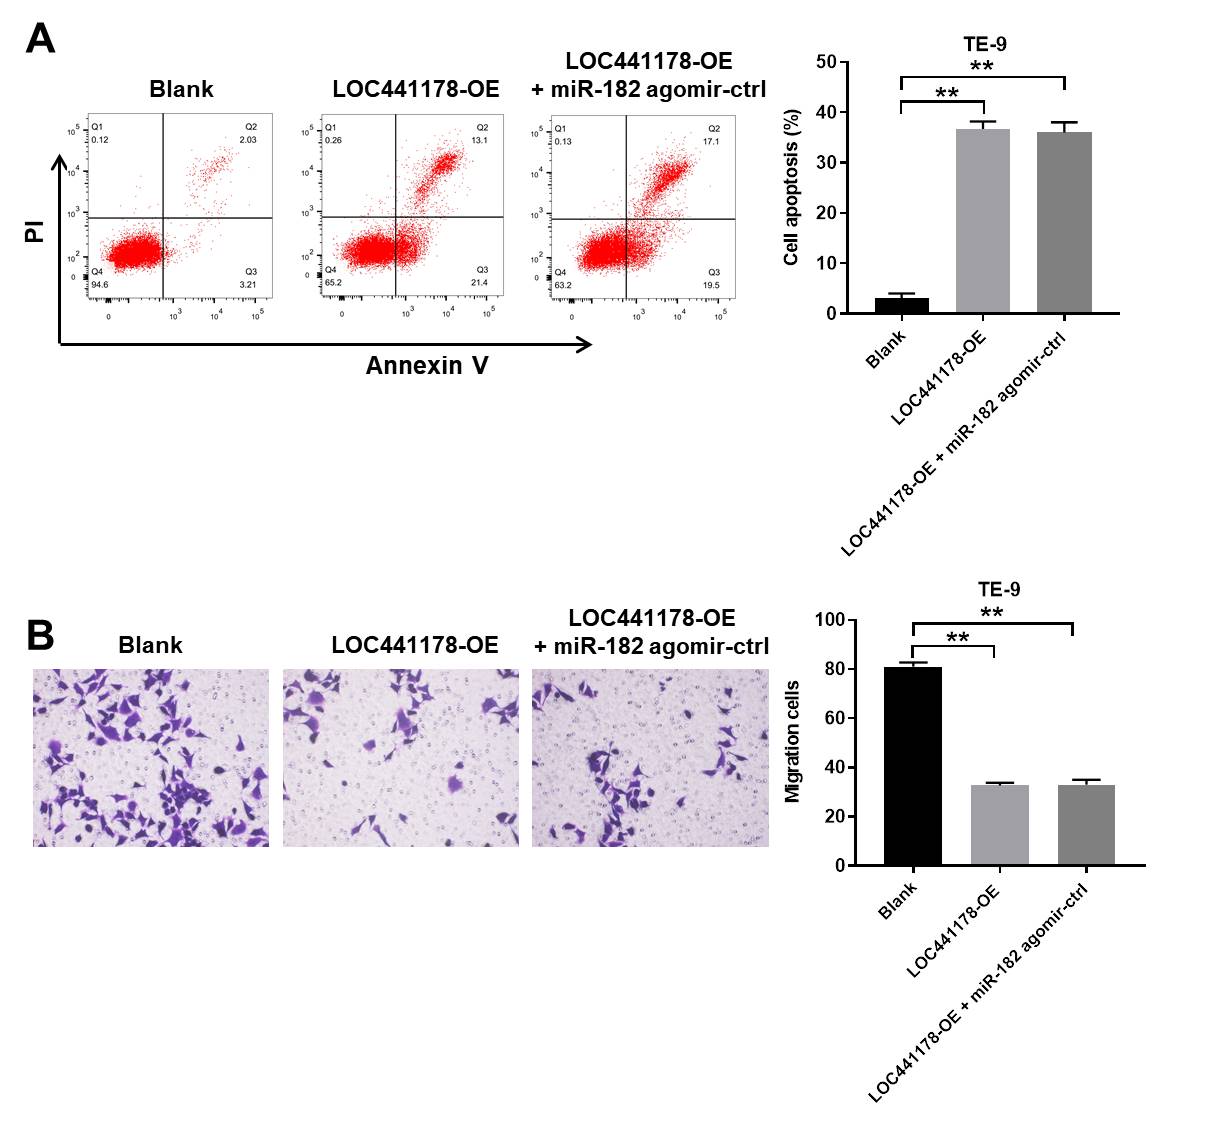


**Supplementary Figure 2 Anti-tumor effect of LOC441178 OE on Eca-109 subcutaneous xenografts *in vivo* was reserved by miR-182 agomir.** Xenografts were treated with 50 nM miR-182 agomir (intra-tumor injection) twice weekly. **(A)** Xenograft tumor volume was monitored weekly. **(B, C)** Xenografts tumors were photographed and weighted. **P<0.01.


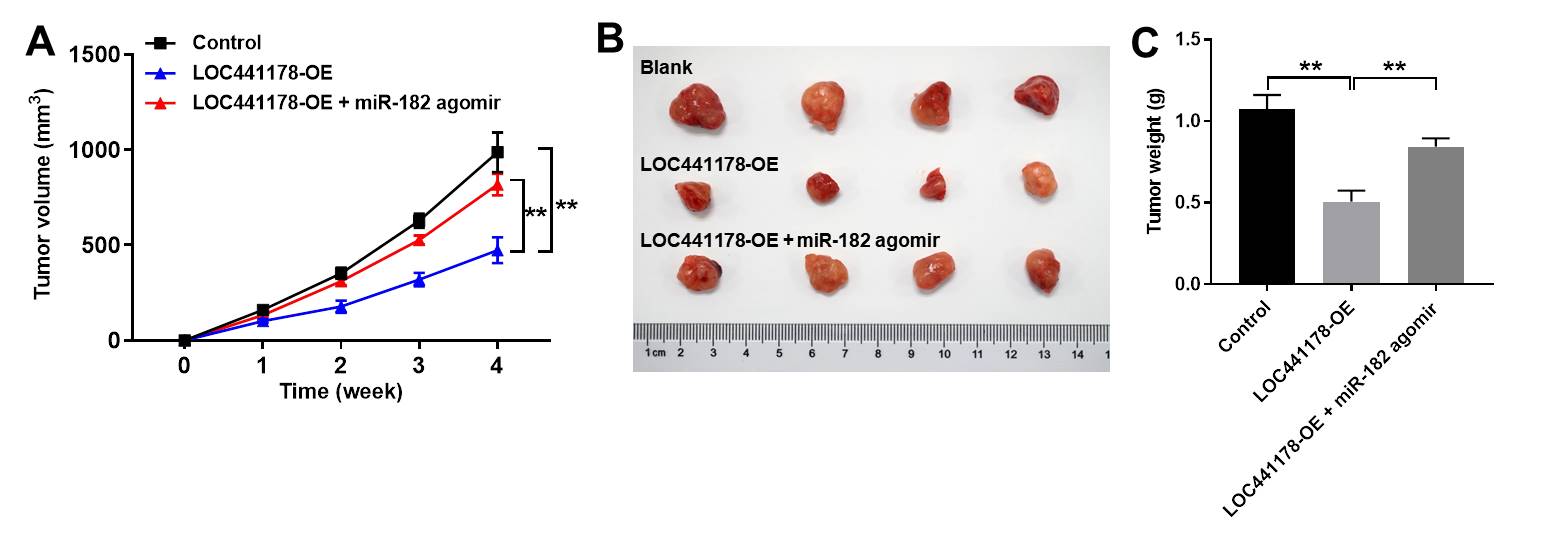


**Supplementary Figure 2 Anti-tumor effect of LOC441178 OE on Eca-109 subcutaneous xenografts *in vivo* was reserved by miR-182 agomir.** Xenografts were treated with 50 nM miR-182 agomir (intra-tumor injection) twice weekly. **(A)** Xenograft tumor volume was monitored weekly. **(B, C)** Xenografts tumors were photographed and weighted. **P<0.01.


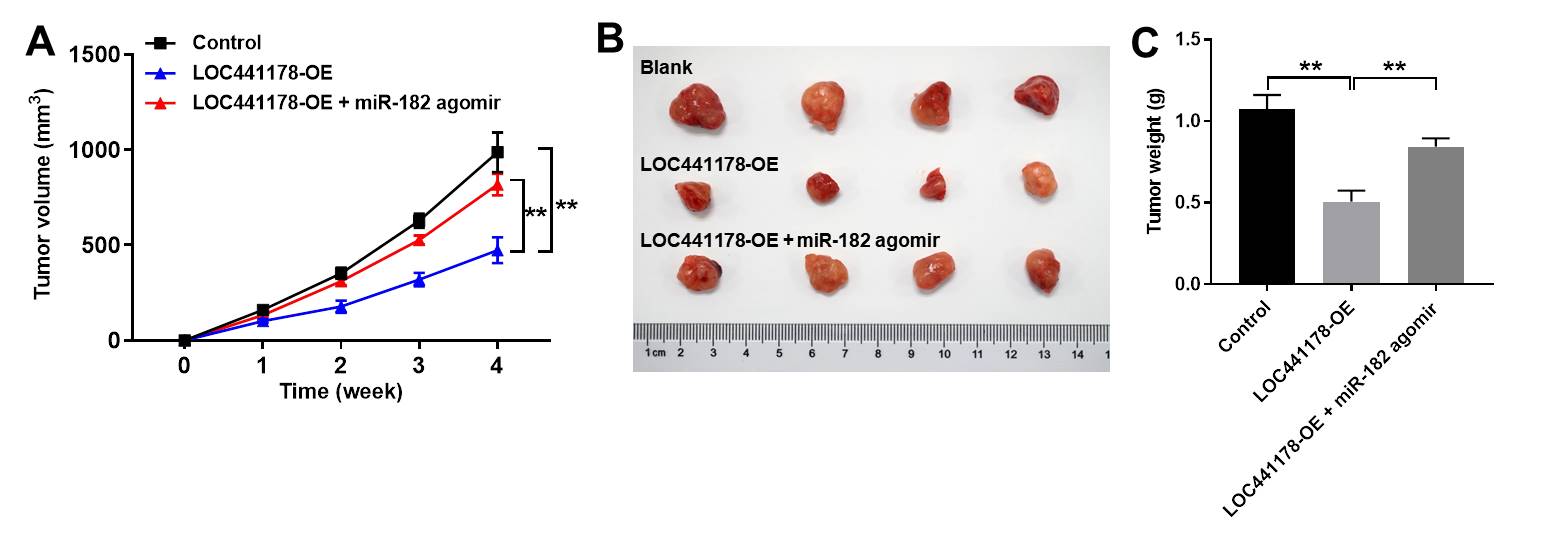

Supplement: Supplementary file 1 [file get_supplementary_file.php]
